# Supplementary material for: Survival Benefits of Adjuvant Chemotherapy for Positive Soft Tissue Surgical Margins Following Radical Cystectomy in Bladder Cancer with Extravesical Extension
Source: MDPI journal article supplement (doi:10.3390/curroncol30030245), 2023-03-10
Supplement: s1 [file s1]

| Supplementary Table S1 – Clinicodemographic Features by Adjuvant Chemotherapy Status |               |            |               |         |
|--------------------------------------------------------------------------------------|---------------|------------|---------------|---------|
|                                                                                      | No AC (N=349) | AC (N=92)  | Total (N=441) | p value |
| <b>Age</b>                                                                           |               |            |               | 0.076   |
| Mean (SD)                                                                            | 70.9 (11.8)   | 68.5 (9.5) | 70.4 (11.4)   |         |
| <b>Sex</b>                                                                           |               |            |               | 0.046   |
| Female                                                                               | 83 (23.8%)    | 13 (14.1%) | 96 (21.8%)    |         |
| Male                                                                                 | 266 (76.2%)   | 79 (85.9%) | 345 (78.2%)   |         |
| <b>pT Stage</b>                                                                      |               |            |               | 0.054   |
| T3b                                                                                  | 176 (50.4%)   | 36 (39.1%) | 212 (48.1%)   |         |
| T4                                                                                   | 173 (49.6%)   | 56 (60.9%) | 229 (51.9%)   |         |
| <b>pN Stage</b>                                                                      |               |            |               | 0.209   |
| Nx                                                                                   | 23 (6.6%)     | 3 (3.3%)   | 26 (5.9%)     |         |
| N0                                                                                   | 186 (53.3%)   | 44 (47.8%) | 230 (52.2%)   |         |
| N1-3                                                                                 | 140 (40.1%)   | 45 (48.9%) | 185 (42.0%)   |         |
| <b>ECOG</b>                                                                          |               |            |               | 0.930   |
| N-Miss                                                                               | 0             | 1 (1.1%)   | 1 (0.2%)      |         |
| 0                                                                                    | 229 (65.6%)   | 63 (68.5%) | 292 (66.4%)   |         |
| 1                                                                                    | 86 (24.6%)    | 20 (21.7%) | 106 (24.1%)   |         |
| 2                                                                                    | 24 (6.9%)     | 5 (5.4%)   | 29 (6.6%)     |         |
| 3                                                                                    | 8 (2.3%)      | 2 (2.2%)   | 10 (2.2%)     |         |
| 4                                                                                    | 2 (0.6%)      | 1 (1.1%)   | 3 (0.7%)      |         |
| <b>Neoadjuvant Chemotherapy</b>                                                      |               |            |               | 0.834   |
| No                                                                                   | 193 (55.3%)   | 52 (56.5%) | 245 (55.6%)   |         |
| Yes                                                                                  | 156 (44.7%)   | 40 (43.5%) | 196 (44.4%)   |         |
| <b>Soft Tissue Margin</b>                                                            |               |            |               | 0.771   |
| Negative                                                                             | 272 (77.9%)   | 73 (79.3%) | 345 (78.2%)   |         |
| Positive                                                                             | 77 (22.1%)    | 19 (20.7%) | 96 (21.8%)    |         |

| Supplementary Table S2 - Univariable and Multivariable Cox-Proportional Hazards Model for Progression-Free Survival and Overall Survival Patients with Positive Surgical Margins |           |            |                           |                           |                           |                           |
|----------------------------------------------------------------------------------------------------------------------------------------------------------------------------------|-----------|------------|---------------------------|---------------------------|---------------------------|---------------------------|
|                                                                                                                                                                                  |           | N          | Progression-Free Survival |                           | Overall Survival          |                           |
|                                                                                                                                                                                  |           |            | HR (univariable)          | HR (multivariable)        | HR (univariable)          | HR (multivariable)        |
| Age                                                                                                                                                                              | Mean (SD) | 72.0 (9.5) | 1.01 (0.99-1.04, p=0.406) | 1.00 (0.97-1.03, p=0.908) | 1.01 (0.99-1.04, p=0.305) | 1.00 (0.97-1.03, p=0.852) |
| ECOG                                                                                                                                                                             |           |            |                           |                           |                           |                           |
|                                                                                                                                                                                  | 0         | 53 (55.2)  | -                         | -                         | -                         | -                         |
|                                                                                                                                                                                  | 1         | 27 (28.1)  | 0.96 (0.59-1.57, p=0.864) | 1.11 (0.67-1.86, p=0.682) | 1.02 (0.61-1.71, p=0.941) | 1.02 (0.60-1.74, p=0.945) |
|                                                                                                                                                                                  | 2         | 11 (11.5)  | 1.19 (0.58-2.45, p=0.642) | 1.92 (0.88-4.18, p=0.101) | 0.84 (0.39-1.81, p=0.661) | 0.85 (0.38-1.90, p=0.687) |
|                                                                                                                                                                                  | 3         | 4 (4.2)    | 1.37 (0.49-3.84, p=0.549) | 0.95 (0.31-2.89, p=0.927) | 0.79 (0.24-2.57, p=0.693) | 0.61 (0.18-2.08, p=0.430) |

**Supplementary Table S2 - Univariable and Multivariable Cox-Proportional Hazards Model for Progression-Free Survival and Overall Survival Patients with Positive Surgical Margins**

|                          |      | N         | Progression-Free Survival  |                            | Overall Survival           |                            |
|--------------------------|------|-----------|----------------------------|----------------------------|----------------------------|----------------------------|
|                          |      |           | HR (univariable)           | HR (multivariable)         | HR (univariable)           | HR (multivariable)         |
| pT Stage                 | 4    | 1 (1.0)   | 3.09 (0.41-23.01, p=0.271) | 2.36 (0.31-18.16, p=0.410) | 5.49 (0.72-41.97, p=0.101) | 5.82 (0.72-46.92, p=0.098) |
|                          | T3b  | 26 (27.1) | -                          | -                          | -                          | -                          |
|                          | T4   | 70 (72.9) | 0.73 (0.45-1.19, p=0.203)  | 0.80 (0.47-1.35, p=0.406)  | 0.85 (0.51-1.40, p=0.515)  | 1.02 (0.59-1.75, p=0.952)  |
| pN Stage                 | N0   | 42 (43.8) | -                          | -                          | -                          | -                          |
|                          | N1-3 | 41 (42.7) | 1.89 (1.18-3.02, p=0.008)  | 2.01 (1.22-3.30, p=0.006)  | 1.20 (0.74-1.95, p=0.453)  | 1.06 (0.63-1.77, p=0.828)  |
|                          | Nx   | 13 (13.5) | 1.88 (0.91-3.87, p=0.089)  | 1.47 (0.68-3.19, p=0.327)  | 1.72 (0.81-3.66, p=0.156)  | 1.47 (0.65-3.33, p=0.360)  |
| Neoadjuvant Chemotherapy | No   | 47 (49.0) | -                          | -                          | -                          | -                          |
|                          | Yes  | 49 (51.0) | 1.00 (0.65-1.54, p=0.994)  | 0.85 (0.52-1.39, p=0.514)  | 0.87 (0.55-1.37, p=0.547)  | 0.73 (0.44-1.24, p=0.245)  |
| Adjuvant Chemotherapy    | No   | 77 (80.2) | -                          | -                          | -                          | -                          |
|                          | Yes  | 19 (19.8) | 0.35 (0.19-0.62, p<0.001)  | 0.31 (0.16-0.61, p=0.001)  | 0.44 (0.24-0.78, p=0.005)  | 0.41 (0.21-0.78, p=0.007)  |

**Supplementary Table S3 - Univariable and Multivariable Cox-Proportional Hazards Model for Progression-Free Survival and Overall Survival Patients with Negative Surgical Margins**

|             |           | N           | Progression-Free Survival |                           | Overall Survival          |                           |
|-------------|-----------|-------------|---------------------------|---------------------------|---------------------------|---------------------------|
|             |           |             | HR (univariable)          | HR (multivariable)        | HR (univariable)          | HR (multivariable)        |
| Age<br>ECOG | Mean (SD) | 70.4 (10.7) | 1.01 (1.00-1.02, p=0.148) | 1.01 (1.00-1.02, p=0.094) | 1.01 (0.99-1.02, p=0.295) | 1.01 (0.99-1.02, p=0.341) |
|             | 0         | 239 (69.5)  | -                         | -                         | -                         | -                         |
|             | 1         | 79 (23.0)   | 1.10 (0.82-1.48, p=0.520) | 1.07 (0.79-1.45, p=0.641) | 1.11 (0.80-1.53, p=0.528) | 1.09 (0.79-1.51, p=0.587) |
|             | 2         | 18 (5.2)    | 1.60 (0.96-2.68, p=0.072) | 1.61 (0.95-2.73, p=0.077) | 1.58 (0.91-2.73, p=0.106) | 1.65 (0.95-2.89, p=0.078) |
|             | 3         | 6 (1.7)     | 2.08 (0.85-5.06, p=0.108) | 2.25 (0.91-5.59, p=0.080) | 1.84 (0.75-4.51, p=0.180) | 1.89 (0.76-4.72, p=0.170) |
|             |           |             |                           |                           |                           |                           |

**Supplementary Table S3 - Univariable and Multivariable Cox-Proportional Hazards Model for Progression-Free Survival and Overall Survival Patients with Negative Surgical Margins**

|                          |      | N          | Progression-Free Survival |                            | Overall Survival           |                            |
|--------------------------|------|------------|---------------------------|----------------------------|----------------------------|----------------------------|
|                          |      |            | HR (univariable)          | HR (multivariable)         | HR (univariable)           | HR (multivariable)         |
| pT Stage                 | 4    | 2 (0.6)    | 1.14 (0.16-8.13, p=0.898) | 2.11 (0.29-15.42, p=0.461) | 2.04 (0.28-14.64, p=0.478) | 3.28 (0.45-24.15, p=0.243) |
|                          | T3b  | 186 (54.1) | -                         | -                          | -                          | -                          |
|                          | T4   | 158 (45.9) | 1.35 (1.06-1.73, p=0.015) | 1.30 (1.01-1.69, p=0.044)  | 1.38 (1.06-1.79, p=0.017)  | 1.32 (1.00-1.74, p=0.050)  |
| pN Stage                 | N0   | 188 (54.7) | -                         | -                          | -                          | -                          |
|                          | N1-3 | 143 (41.6) | 2.47 (1.92-3.19, p<0.001) | 2.50 (1.93-3.26, p<0.001)  | 1.98 (1.51-2.60, p<0.001)  | 1.97 (1.49-2.60, p<0.001)  |
|                          | Nx   | 13 (3.8)   | 1.52 (0.84-2.77, p=0.167) | 1.35 (0.73-2.51, p=0.345)  | 1.75 (0.96-3.19, p=0.068)  | 1.59 (0.85-2.96, p=0.144)  |
| Neoadjuvant Chemotherapy |      |            |                           |                            |                            |                            |
|                          | No   | 198 (57.6) | -                         | -                          | -                          | -                          |
|                          | Yes  | 146 (42.4) | 1.12 (0.87-1.43, p=0.374) | 1.09 (0.84-1.42, p=0.516)  | 1.02 (0.78-1.33, p=0.900)  | 1.00 (0.75-1.32, p=0.984)  |
| Adjuvant Chemotherapy    |      |            |                           |                            |                            |                            |
|                          | No   | 272 (79.1) | -                         | -                          | -                          | -                          |
|                          | Yes  | 72 (20.9)  | 0.77 (0.57-1.05, p=0.096) | 0.65 (0.47-0.88, p=0.006)  | 0.83 (0.60-1.14, p=0.249)  | 0.74 (0.53-1.03, p=0.074)  |

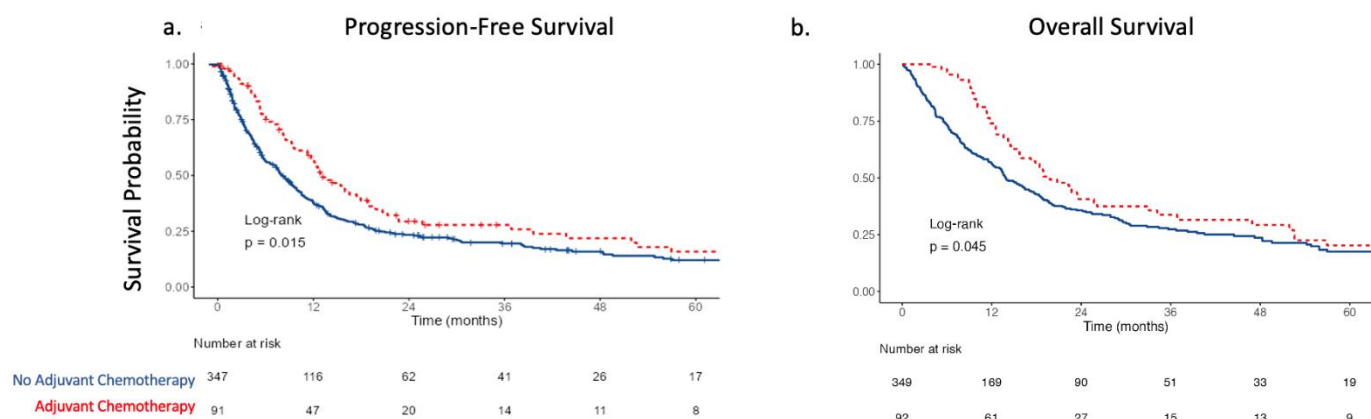

Supplementary Figure S1 - (a.) Progression-Free and (b.) Overall survival stratified by Adjuvant Chemotherapy status in patients undergoing radical cystectomy.
